# Supplementary material for: Red luminescent Eu2+ in K2MgH4 and comparison with KMgH3
Source: Royal Society of Chemistry journal article supplement (doi:10.1039/c9tc06459a), 2020-01-01
Supplement: c9tc06459a1.pdf [file c9tc06459a1.pdf]

## Supporting Information

### Red Luminescent $\text{Eu}^{2+}$ in $\text{K}_2\text{MgH}_4$ and Comparison with $\text{KMgH}_3$

Jumpei Ueda,<sup>\*a</sup> Thomas Wylezich,<sup>b</sup> Nathalie Kunkel<sup>\*b,c</sup> and Setsuhisa Tanabe<sup>a</sup>

---

<sup>a</sup> Graduate School of Human and Environmental Studies, Kyoto University, Yoshida-Nihonmatsu-cho, Sakyo-ku, Kyoto 606-8501, Japan.

Email: [ueda.jumpei.5r@kyoto-u.ac.jp](mailto:ueda.jumpei.5r@kyoto-u.ac.jp)

<sup>b</sup> Chemistry Department, Technische Universität München, Lichtenbergstr. 4, 85747 Garching, Germany.

<sup>c</sup> Institut für Anorganische Chemie, Universität Göttingen, Tammannstr. 4, 37077 Göttingen, Germany.

Email: [nathalie.kunkel@uni-goettingen.de](mailto:nathalie.kunkel@uni-goettingen.de)

† Electronic Supplementary Information (ESI) available: [details of any supplementary information available should be included here]. See DOI: 10.1039/x0xx00000x.

**Rietveld refinement of XRD**

The Rietveld analysis for the obtained XRD patterns were performed by FullProf. Cell parameters, thermal factors  $B_{iso}$  of K and Mg, shape parameters and asymmetry were refined. Table S1 shows the refined lattice parameters and atomic parameters for  $K_2MgH_4$ .

Table S1. Refined lattice parameters and atomic parameters for  $K_2MgH_4$ .

| $K_2MgH_4$ |      | $a=b=4.0457(2) \text{ \AA}$ and $c= 13.6204(8) \text{ \AA}$ , $R_{wp}=10.2\%$ , $R_{Bragg}=5.94\%$ |         |         |                          |       |
|------------|------|----------------------------------------------------------------------------------------------------|---------|---------|--------------------------|-------|
| Atom       | site | x                                                                                                  | y       | z       | $B_{iso} (\text{\AA}^2)$ | s.o.f |
| K          | 4e   | 0.00000                                                                                            | 0.00000 | 0.35500 | 0.601(161)               | 1     |
| Mg         | 2a   | 0.00000                                                                                            | 0.00000 | 0.00000 | 0.005(192)               | 1     |
| H1         | 4e   | 0.00000                                                                                            | 0.00000 | 0.14500 | 1.000(0)                 | 1     |
| H2         | 4c   | 0.50000                                                                                            | 0.00000 | 0.00000 | 1.000(0)                 | 1     |

**Temperature dependence of PL spectra**

Figure S1 shows the normalized PL spectra at different temperatures from 100 K to 350K. The centroid wavelength of the PL band is almost unchanged with temperature. The PL bandwidth slightly broadens with increasing temperature.

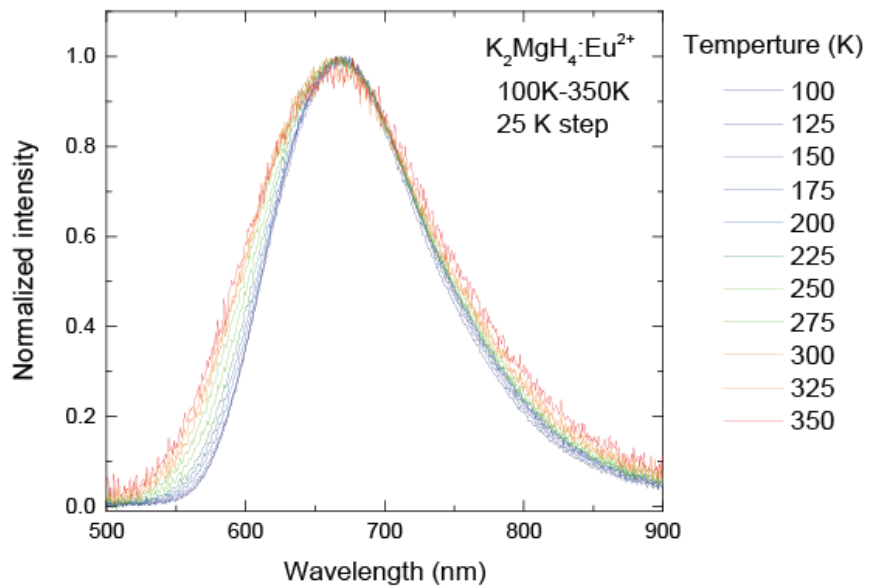

Figure S1. Normalized PL spectra at different temperatures from 100 K to 350 K.
